# Supplementary material for: Structure Prediction of the Second Extracellular Loop in G-Protein-Coupled Receptors
Source: PubMed Central journal article supplement (PMC4052351; doi:10.1016/j.bpj.2014.04.022), 2014-06-03
Supplement: mmc1.pdf [file mmc1.pdf]

# Structure Prediction of the Second Extracellular Loop in G-Protein-Coupled Receptors

Sebastian Kmiecik,<sup>†</sup> Michal Jamroz,<sup>†</sup> and Michal Kolinski<sup>‡\*</sup>

<sup>†</sup>University of Warsaw, Faculty of Chemistry, Laboratory of Theory of Biopolymers, Pasteura 1, 02-093 Warsaw, Poland; and <sup>‡</sup>Mossakowski Medical Research Center, Polish Academy of Sciences, Bioinformatics Laboratory, Pawinskiego 5, 02-106 Warsaw, Poland

## Supporting information

**Figure S1. Predictions superimposed on crystal structures.** Predicted models of the second extracellular loop are shown in red, together with the first and third extracellular loops colored in green, and reference crystal structure shown in gray. The models are presented for 7 receptor cases (the remaining are displayed in Figure S2): model with the lowest energy (LE), model showing the lowest RMSD from the 10 lowest energy models (LE10) and model showing the lowest RMSD from the 100 lowest energy models (LE100), model representing the largest cluster (LC), model showing the lowest RMSD from the representatives of 10 largest clusters (LC10), model showing the lowest RMSD from the representatives of 100 largest clusters (LC100).

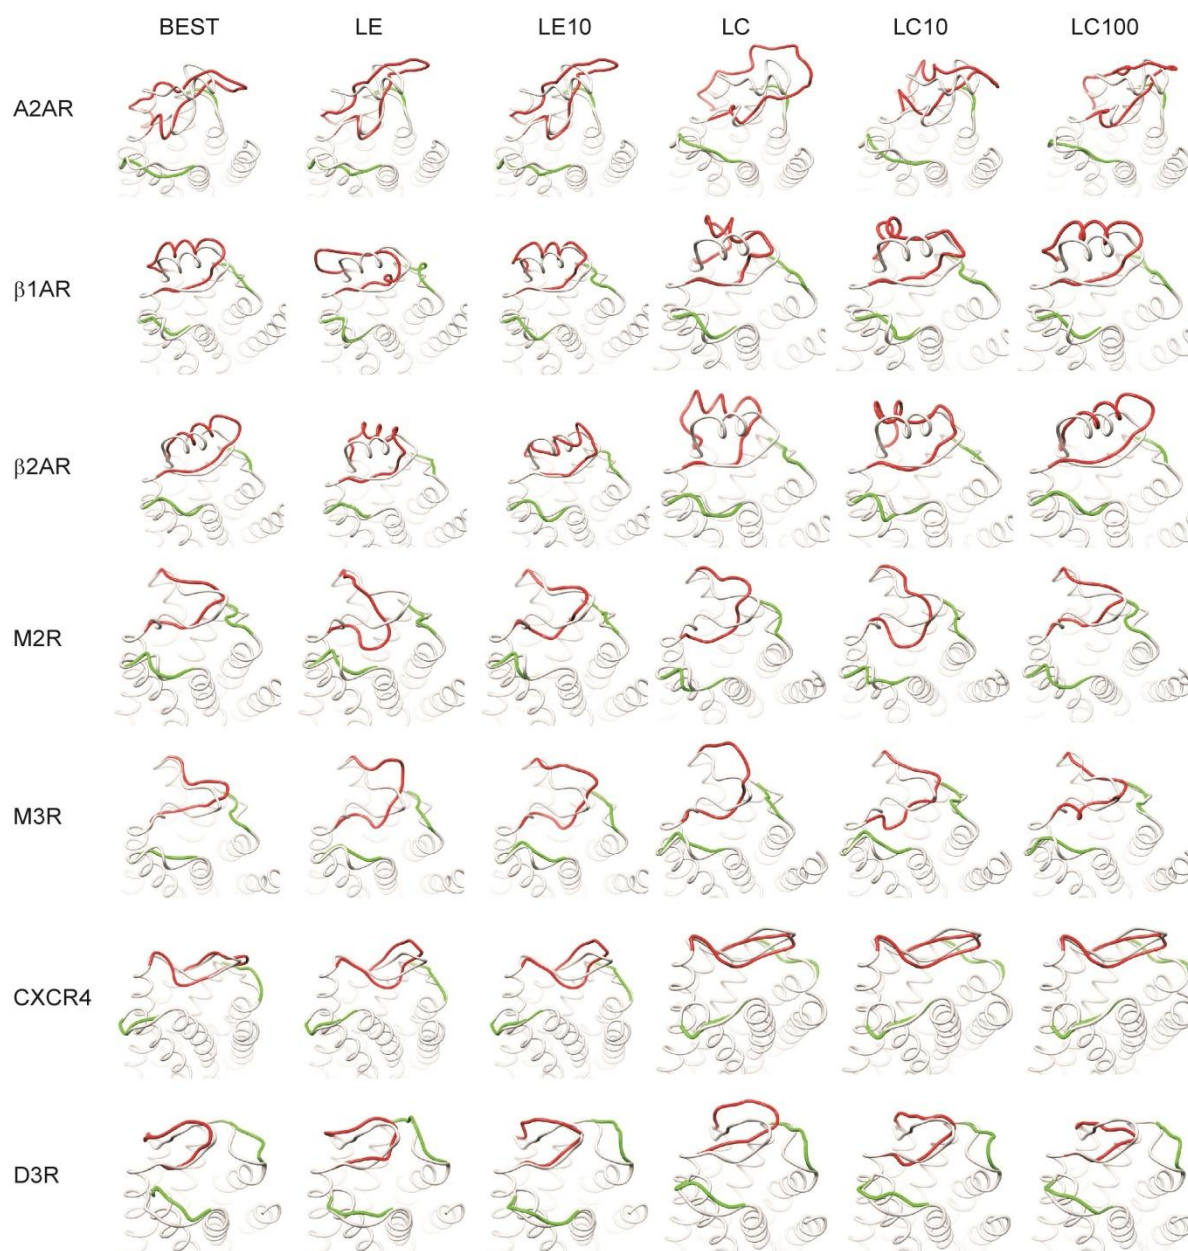

**Figure S2. Predictions superimposed on crystal structures.** Predicted models of the second extracellular loop are shown in red, together with the first and third extracellular loops colored in green, and the reference crystal structure shown in gray. The models are presented for 6 receptor cases (the remaining are displayed in Figure S1): model with the lowest energy (LE), model showing the lowest RMSD from the 10 lowest energy models (LE10) and model showing the lowest RMSD from the 100 lowest energy models (LE100), model representing the largest cluster (LC), model showing the lowest RMSD from the representatives of 10 largest clusters (LC10), model showing the lowest RMSD from the representatives of 100 largest clusters (LC100).

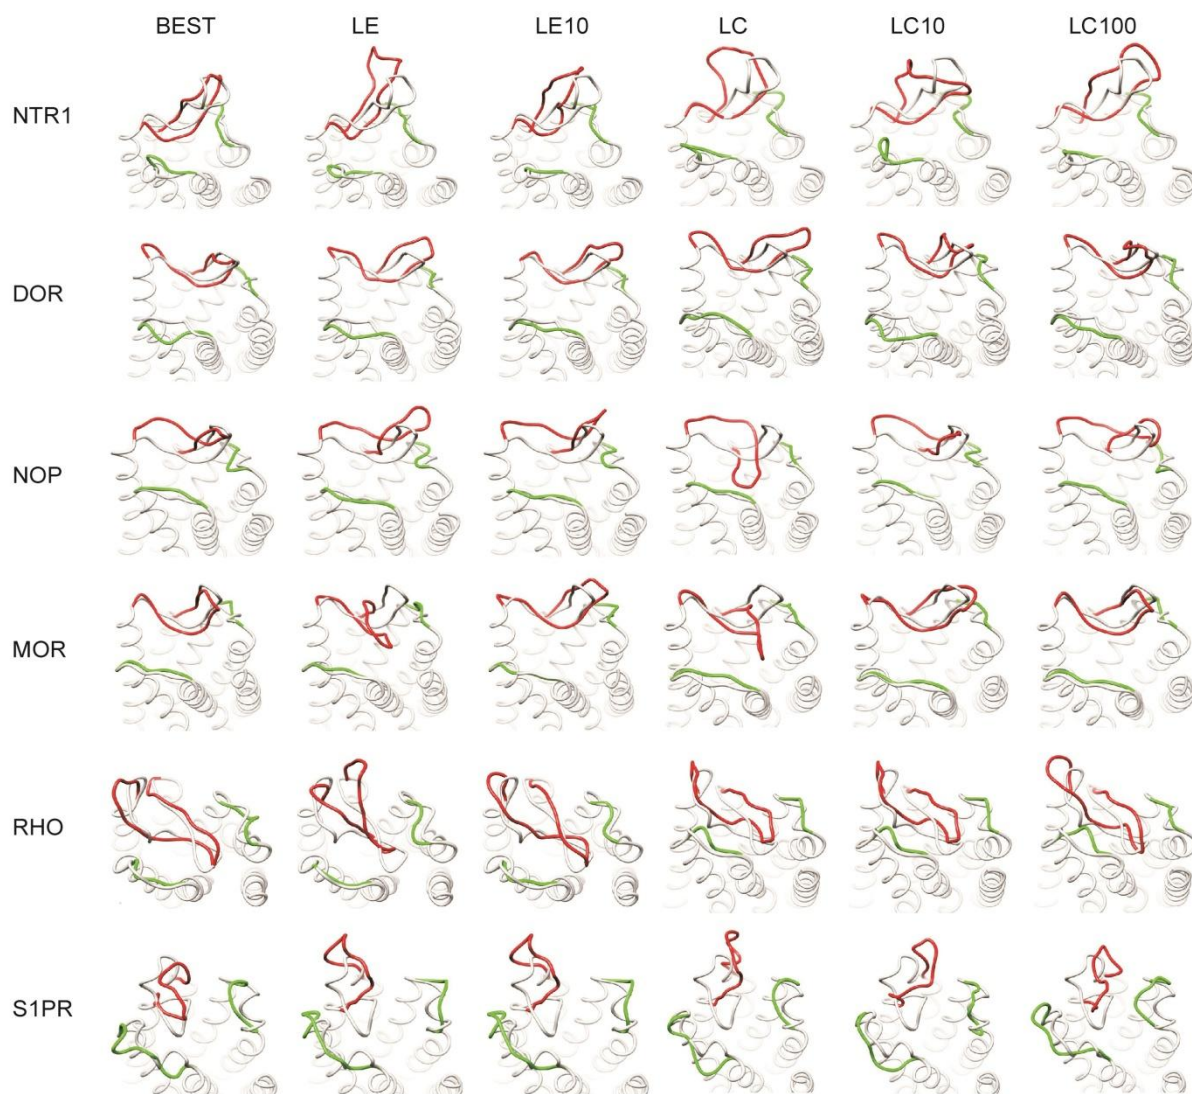

**Table S1. Disulfide bridges used in the modeling.** A well conserved disulfide bridge between TM3 and EC2 is marked bold. The other bridges occur within extracellular elements only.

| <b>Receptor name</b> | <b>CYS-CYS pairs</b>                            |
|----------------------|-------------------------------------------------|
| A2AR                 | 71 ↔ 159, 74 ↔ 146, <b>77 ↔ 166</b> , 259 ↔ 262 |
| β1AR                 | <b>114 ↔ 199</b> , 192 ↔ 198                    |
| β2AR                 | <b>106 ↔ 191</b> , 184 ↔ 190                    |
| M2R                  | <b>96 ↔ 176</b> , 413 ↔ 416                     |
| M3R                  | <b>140 ↔ 220</b> , 516 ↔ 519                    |
| CXCR4                | 28 ↔ 274, <b>109 ↔ 186</b>                      |
| D3R                  | <b>103 ↔ 181</b> , 355 ↔ 358                    |
| NTR1                 | <b>142 ↔ 225</b>                                |
| DOR                  | <b>121 ↔ 198</b>                                |
| NOP                  | <b>123 ↔ 200</b>                                |
| MOR                  | <b>140 ↔ 217</b>                                |
| RHO                  | <b>110 ↔ 187</b>                                |
| S1PR                 | <b>184 ↔ 191</b> , 282 ↔ 287                    |

**Table S2. Consensus prediction and DSSP assignment of secondary structure for extracellular loops.**

| Receptor name | Secondary structure of ECL2                                  |                                                                                                             |
|---------------|--------------------------------------------------------------|-------------------------------------------------------------------------------------------------------------|
| A2AR          | AA sequence<br>consensus SS prediction<br>DSSP SS assignment | PMLGWNNCGQPKEGKNHSQGC GEGQVACLFEDVV<br>CCCCCCCCCCCCCCCCCCCCCEEEEEEECCC<br>HHHCCCCCCCCCHHHHHHHCCCCCEEECHHHHC |
| $\beta$ 1AR   | AA sequence<br>consensus SS prediction<br>DSSP SS assignment | WWRDEDPQALKCYQDPGCCDFVT<br>CCCCCCHHHHHHCCCCCCCCCCCC<br>CCCCCCHHHHHHHHCCCCCCCCCCCC                           |
| $\beta$ 2AR   | AA sequence<br>consensus SS prediction<br>DSSP SS assignment | WYRATHQEAINCYANETCCDFFT<br>CCCCCCHHHHHHHHCCCCCCCCCCCC<br>CCCCCCHHHHHHHHCCCCCCCCCCCC                         |
| M2R           | AA sequence<br>consensus SS prediction<br>DSSP SS assignment | VRTVEDGECYIQFFS<br>CEEEECCEEEEEHHHH<br>CCCCCCCCCCCCCCCC                                                     |
| M3R           | AA sequence<br>consensus SS prediction<br>DSSP SS assignment | KRTVPPGECFIQFLS<br>CEEEECCEEEEEHHHH<br>CCCCCCCCCCCCCCCC                                                     |
| CXCR4         | AA sequence<br>consensus SS prediction<br>DSSP SS assignment | NVSEADDRYICDRFYF<br>CCCCCEEEEECCCCC<br>EEEEECCEEEEECCCC                                                     |
| D3R           | AA sequence<br>consensus SS prediction<br>DSSP SS assignment | FNTTGDPTVCSIS<br>CCCCCCCCEEEEEC<br>CCCCCCCCCCCCCCCC                                                         |
| NTR1          | AA sequence<br>consensus SS prediction<br>DSSP SS assignment | GLQNRSGDGTHTPGGLVCTPIV<br>CCCCCCCCCCCCCEEEEECCC<br>EEEECCCCCCCCCEEEEECCC                                    |
| DOR           | AA sequence<br>consensus SS prediction<br>DSSP SS assignment | VTQPRDGAVVCMQLQFPS<br>CCCCCCCCEEEEEECCC<br>EEEEECCEEEEECCCC                                                 |
| MOR           | AA sequence<br>consensus SS prediction<br>DSSP SS assignment | TTKYRQGSIDCTLTFSH<br>CCCCCCCCEEEEEEEEEC<br>CCEEECCCEEECCCCC                                                 |
| NOP           | AA sequence<br>consensus SS prediction<br>DSSP SS assignment | SAQVEDEEIECLVEIPT<br>CCCCCCCCEEEEEECCC<br>EECCCCCCCCCEEECCCC                                                |
| RHO           | AA sequence<br>consensus SS prediction<br>DSSP SS assignment | WSRYIPEGMQCSCGIDYYTPHEET<br>CCCCCCCCEEEEECCEEECCCCC<br>CCCEEECCCCCEEECCCCCCCC                               |
| S1PR          | AA sequence<br>consensus SS prediction<br>DSSP SS assignment | WNCISALSSCSTVLPLY<br>CCHHHHCCCCCEEECCC<br>CCCCCCCCCCCCCCCC                                                  |

E - extended conformation, H - helix, C - undefined/coil

**Table S3. Results of scoring according to all-atom energy values. RMSD values between backbone atoms of three extracellular loops and their native counterparts are shown.**

| Receptor name | Loop           | RMSD <sup>BEST</sup> (Å) | RMSD <sup>LE</sup> (Å) | RMSD <sup>LE10</sup> (Å) | RMSD <sup>LE100</sup> (Å) |
|---------------|----------------|--------------------------|------------------------|--------------------------|---------------------------|
| A2AR          | ECL1           | 0.40                     | 1.15                   | 1.15                     | 1.15                      |
|               | ECL2           | 4.67                     | 5.88                   | 5.88                     | 5.88                      |
|               | ECL3           | 0.70                     | 2.50                   | 2.50                     | 2.50                      |
|               | ECL1+ECL2+ECL3 | 4.24                     | 5.32                   | 5.32                     | 5.32                      |
| β1AR          | ECL1           | 1.43                     | 2.47                   | 3.39                     | 3.14                      |
|               | ECL2           | 3.28                     | 5.81                   | 3.57                     | 3.40                      |
|               | ECL3           | 0.65                     | 1.01                   | 2.24                     | 2.01                      |
|               | ECL1+ECL2+ECL3 | 3.07                     | 5.09                   | 3.40                     | 3.22                      |
| β2AR          | ECL1           | 0.90                     | 2.27                   | 2.83                     | 2.08                      |
|               | ECL2           | 3.38                     | 5.51                   | 4.43                     | 3.82                      |
|               | ECL3           | 0.76                     | 2.21                   | 2.33                     | 1.36                      |
|               | ECL1+ECL2+ECL3 | 3.07                     | 4.88                   | 4.04                     | 3.41                      |
| M2R           | ECL1           | 0.62                     | 1.05                   | 1.91                     | 1.91                      |
|               | ECL2           | 2.65                     | 5.12                   | 2.87                     | 2.87                      |
|               | ECL3           | 0.43                     | 1.81                   | 1.20                     | 1.20                      |
|               | ECL1+ECL2+ECL3 | 2.50                     | 4.23                   | 2.50                     | 2.50                      |
| M3R           | ECL1           | 0.76                     | 3.57                   | 3.15                     | 1.99                      |
|               | ECL2           | 2.53                     | 4.65                   | 4.11                     | 2.98                      |
|               | ECL3           | 0.51                     | 2.60                   | 2.17                     | 2.00                      |
|               | ECL1+ECL2+ECL3 | 2.46                     | 4.18                   | 3.68                     | 2.68                      |
| CXCR4         | ECL1           | 1.45                     | 2.73                   | 2.73                     | 3.44                      |
|               | ECL2           | 2.41                     | 3.08                   | 3.08                     | 2.41                      |
|               | ECL3           | 0.41                     | 0.77                   | 0.77                     | 1.10                      |
|               | ECL1+ECL2+ECL3 | 2.45                     | 2.77                   | 2.77                     | 2.46                      |
| D3R           | ECL1           | 1.08                     | 3.47                   | 5.04                     | 4.00                      |
|               | ECL2           | 2.14                     | 3.43                   | 2.88                     | 2.36                      |
|               | ECL3           | 1.06                     | 2.73                   | 2.95                     | 2.63                      |
|               | ECL1+ECL2+ECL3 | 2.44                     | 3.30                   | 3.56                     | 2.91                      |
| NTR1          | ECL1           | 1.90                     | 3.59                   | 2.89                     | 3.23                      |
|               | ECL2           | 2.99                     | 8.82                   | 4.74                     | 3.70                      |
|               | ECL3           | 0.81                     | 1.77                   | 1.94                     | 2.03                      |
|               | ECL1+ECL2+ECL3 | 2.90                     | 7.55                   | 4.20                     | 3.45                      |
| DOR           | ECL1           | 1.20                     | 2.41                   | 2.23                     | 2.68                      |
|               | ECL2           | 1.92                     | 5.04                   | 3.63                     | 2.93                      |
|               | ECL3           | 1.43                     | 3.83                   | 3.68                     | 1.87                      |
|               | ECL1+ECL2+ECL3 | 2.15                     | 4.51                   | 3.46                     | 2.72                      |
| MOR           | ECL1           | 0.79                     | 2.87                   | 2.31                     | 2.55                      |
|               | ECL2           | 1.92                     | 6.78                   | 3.22                     | 2.43                      |
|               | ECL3           | 0.55                     | 0.94                   | 1.01                     | 1.36                      |
|               | ECL1+ECL2+ECL3 | 2.08                     | 5.72                   | 2.84                     | 2.31                      |
| NOP           | ECL1           | 0.78                     | 3.06                   | 2.89                     | 3.51                      |
|               | ECL2           | 4.47                     | 6.22                   | 5.48                     | 4.55                      |
|               | ECL3           | 0.58                     | 2.83                   | 1.80                     | 1.86                      |
|               | ECL1+ECL2+ECL3 | 4.05                     | 5.40                   | 4.72                     | 4.07                      |
| RHO           | ECL1           | 1.03                     | 4.16                   | 1.49                     | 3.62                      |
|               | ECL2           | 4.20                     | 8.21                   | 4.68                     | 4.31                      |
|               | ECL3           | 0.56                     | 1.43                   | 1.59                     | 2.65                      |
|               | ECL1+ECL2+ECL3 | 3.90                     | 7.28                   | 4.13                     | 4.06                      |
| S1PR          | ECL1           | 1.63                     | 3.39                   | 3.39                     | 4.23                      |
|               | ECL2           | 4.40                     | 7.40                   | 7.40                     | 6.86                      |
|               | ECL3           | 2.04                     | 4.90                   | 4.90                     | 6.16                      |
|               | ECL1+ECL2+ECL3 | 4.18                     | 6.07                   | 6.07                     | 6.20                      |

RMSD<sup>BEST</sup> – lowest RMSD observed in all CABS generated models

RMSD<sup>LE</sup> – RMSD value for the loop corresponding to the model with the lowest potential energy

$\text{RMSD}^{\text{LE}10}$  – lowest RMSD value for ECL2 observed among 10 models with the lowest potential energy and corresponding RMSD values for ECL1, ECL3 and combination of ECL1+ECL2+ECL3

$\text{RMSD}^{\text{LE}100}$  – lowest RMSD values for ECL2 observed among 100 models with the lowest potential energy and corresponding RMSD values for ECL1, ECL3 and combination of ECL1+ECL2+ECL3

**Table S4. Results of scoring according to structural clustering.** RMSD values between backbone atoms of three extracellular loops and their native counterparts are presented.

| Receptor name | Loop           | RMSD <sup>BEST</sup> (Å) | RMSD <sup>LC</sup> (Å) | RMSD <sup>LC10</sup> (Å) | RMSD <sup>LC100</sup> (Å) |
|---------------|----------------|--------------------------|------------------------|--------------------------|---------------------------|
| A2AR          | ECL1           | 0.40                     | 1.22                   | 1.32                     | 1.66                      |
|               | ECL2           | 4.67                     | 8.74                   | 5.00                     | 5.85                      |
|               | ECL3           | 0.70                     | 2.29                   | 1.55                     | 2.31                      |
|               | ECL1+ECL2+ECL3 | 4.24                     | 7.83                   | 4.50                     | 5.29                      |
| β1AR          | ECL1           | 1.43                     | 3.37                   | 3.55                     | 2.42                      |
|               | ECL2           | 3.28                     | 6.85                   | 5.33                     | 3.28                      |
|               | ECL3           | 0.65                     | 2.18                   | 1.92                     | 2.34                      |
|               | ECL1+ECL2+ECL3 | 3.07                     | 6.07                   | 4.81                     | 3.07                      |
| β2AR          | ECL1           | 0.90                     | 2.42                   | 2.26                     | 2.45                      |
|               | ECL2           | 3.38                     | 6.73                   | 4.41                     | 3.38                      |
|               | ECL3           | 0.76                     | 2.95                   | 3.45                     | 2.51                      |
|               | ECL1+ECL2+ECL3 | 3.07                     | 5.96                   | 4.08                     | 3.17                      |
| M2R           | ECL1           | 0.62                     | 2.22                   | 2.42                     | 2.81                      |
|               | ECL2           | 2.65                     | 4.13                   | 3.70                     | 2.65                      |
|               | ECL3           | 0.43                     | 1.39                   | 1.65                     | 1.59                      |
|               | ECL1+ECL2+ECL3 | 2.50                     | 3.51                   | 3.23                     | 2.53                      |
| M3R           | ECL1           | 0.76                     | 2.56                   | 2.26                     | 2.27                      |
|               | ECL2           | 2.53                     | 4.64                   | 3.89                     | 2.63                      |
|               | ECL3           | 0.51                     | 1.86                   | 1.80                     | 2.24                      |
|               | ECL1+ECL2+ECL3 | 2.46                     | 3.97                   | 3.36                     | 2.50                      |
| CXCR4         | ECL1           | 1.45                     | 3.35                   | 3.35                     | 3.35                      |
|               | ECL2           | 2.41                     | 3.56                   | 3.56                     | 3.56                      |
|               | ECL3           | 0.41                     | 1.02                   | 1.02                     | 1.02                      |
|               | ECL1+ECL2+ECL3 | 2.45                     | 3.24                   | 3.24                     | 3.24                      |
| D3R           | ECL1           | 1.08                     | 3.66                   | 3.80                     | 4.00                      |
|               | ECL2           | 2.14                     | 6.10                   | 2.57                     | 2.36                      |
|               | ECL3           | 1.06                     | 3.18                   | 3.19                     | 2.63                      |
|               | ECL1+ECL2+ECL3 | 2.44                     | 5.06                   | 3.05                     | 2.91                      |
| NTR1          | ECL1           | 1.90                     | 3.27                   | 3.23                     | 3.23                      |
|               | ECL2           | 2.99                     | 7.84                   | 4.82                     | 3.70                      |
|               | ECL3           | 0.81                     | 3.05                   | 2.85                     | 2.03                      |
|               | ECL1+ECL2+ECL3 | 2.90                     | 6.79                   | 4.37                     | 3.45                      |
| DOR           | ECL1           | 1.20                     | 1.90                   | 2.91                     | 2.84                      |
|               | ECL2           | 1.92                     | 4.88                   | 3.24                     | 2.08                      |
|               | ECL3           | 1.43                     | 2.62                   | 4.31                     | 3.06                      |
|               | ECL1+ECL2+ECL3 | 2.15                     | 4.18                   | 3.42                     | 2.42                      |
| MOR           | ECL1           | 0.79                     | 2.31                   | 3.04                     | 2.42                      |
|               | ECL2           | 1.92                     | 6.96                   | 2.24                     | 1.92                      |
|               | ECL3           | 0.55                     | 2.08                   | 1.85                     | 2.32                      |
|               | ECL1+ECL2+ECL3 | 2.08                     | 5.87                   | 2.33                     | 2.08                      |
| NOP           | ECL1           | 0.78                     | 3.18                   | 3.09                     | 3.83                      |
|               | ECL2           | 4.47                     | 9.33                   | 5.80                     | 5.56                      |
|               | ECL3           | 0.58                     | 1.78                   | 2.13                     | 1.84                      |
|               | ECL1+ECL2+ECL3 | 4.05                     | 7.83                   | 5.01                     | 4.89                      |
| RHO           | ECL1           | 1.03                     | 4.21                   | 4.21                     | 2.48                      |
|               | ECL2           | 4.20                     | 5.11                   | 5.11                     | 4.36                      |
|               | ECL3           | 0.56                     | 2.98                   | 2.98                     | 4.11                      |
|               | ECL1+ECL2+ECL3 | 3.90                     | 4.79                   | 4.79                     | 4.14                      |
| S1PR          | ECL1           | 1.63                     | 3.39                   | 2.69                     | 5.32                      |
|               | ECL2           | 4.40                     | 8.49                   | 7.66                     | 5.85                      |
|               | ECL3           | 2.04                     | 3.58                   | 4.03                     | 3.51                      |
|               | ECL1+ECL2+ECL3 | 4.18                     | 6.50                   | 5.96                     | 5.15                      |

RMSD<sup>BEST</sup> – the lowest RMSD observed in all CABS generated models

RMSD<sup>LC</sup> – RMSD value for the loop corresponding to the representative model of the largest cluster from CABS simulations



$\text{RMSD}^{\text{LC}10}$  – lowest RMSD values for ECL2 observed among 10 models representing the 10 largest clusters and corresponding RMSD values for ECL1, ECL3 and combination of ECL1+ECL2+ECL3

$\text{RMSD}^{\text{LC}100}$  – lowest RMSD values for ECL2 observed among 100 models representing the 100 largest clusters and corresponding RMSD values for ECL1, ECL3 and combination of ECL1+ECL2+ECL3

**Table S5. Comparison of ECL2 structures of receptors used in the modeling with other available x-ray structures.** ECL2 are compared using RMSD measure for ECL2 backbone atoms. RMSDs values were calculated after optimal superimposition of compared models with excluded loop fragments. X-ray structures were taken from GPCRSD database (structures available by March 12, 2014 - Jianyi Yang and Yang Zhang. GPCRSD: a database for experimentally solved GPCR structures: <http://zhanglab.ccmb.med.umich.edu/GPCRSD/>).

| Receptor name | PDB ID of structure used in the modeling | PDB ID (of alternative X-ray structure): RMSD (in Angstroms, to structure used in the modeling)                                                                                                                                                                                   |
|---------------|------------------------------------------|-----------------------------------------------------------------------------------------------------------------------------------------------------------------------------------------------------------------------------------------------------------------------------------|
| RHO           | 1U19                                     | 1F88: 0.48, 1GZM: 0.34, 1HZX: 0.42, 1L9H: 0.34, 2G87: 0.26, 2HPY: 0.36, 2I35: 0.44, 2I36: 0.92, 2I37: 0.93, 2J4Y: 0.73, 2PED: 0.29, 2X72: 1.93, 3C9L: 0.34, 3C9M: 0.67, 3CAP: 1.75, 3DQB: 1.91, 3OAX: 0.28, 3PQR: 1.85, 3PXO: 1.84, 4A4M: 1.93, 4BEY: 1.87, 4BEZ: 1.88, 4J4: 1.86 |
| $\beta$ 1AR   | 2Y00                                     | 2VT4: 0.67, 2Y01: 0.84, 2Y02: 0.59, 2Y03: 0.62, 2Y04: 0.74, 2YCW: 0.60, 2YCX: 0.82, 2YCY: 0.78, 2YCZ: 0.95, 3ZPQ: 0.52, 3ZPR: 0.41, 4AMI: 0.92, 4AMJ: 0.41, 4GPO: 0.84                                                                                                            |
| A2AR          | 4EIY                                     | 2YDO: 2.14, 2YDV: 2.30, 3EML: 0.42, 3PWH: 0.58, 3QAK: 0.69, 3REY: 0.58, 3RFM: 0.49, 3UZA: 0.52, 3UZC: 0.49, 3VG9: 1.27, 3VGA: 0.70                                                                                                                                                |
| $\beta$ 2AR   | 2RH1                                     | 3D4S: 0.46, 3NY8: 0.57, 3NY9: 0.59, 3NYA: 0.53, 3P0G: 0.71, 3PDS: 0.83, 3SN6: 0.89, 4GBR: 0.43, 4LDE: 0.76, 4LDL: 0.74, 4LDO: 0.69                                                                                                                                                |
| CXCR4         | 3ODU                                     | 3OE0: 1.31, 3OE6: 0.68, 3OE8: 0.86, 3OE9: 1.91                                                                                                                                                                                                                                    |
| NTR1          | 4GRV                                     | 3ZEV: 1.46, 4BUO: 1.54, 4BV0: 1.62, 4BWB: 1.29                                                                                                                                                                                                                                    |
| M2R           | 3UON                                     | 4MQS: 2.46, 4MQT: 2.50                                                                                                                                                                                                                                                            |
| DOR           | 4EJ4                                     | 4N6H: 0.85                                                                                                                                                                                                                                                                        |
| S1PR          | 3V2W                                     | 3V2Y: 0.53                                                                                                                                                                                                                                                                        |

The RMSD values calculated for ECL2 are low (RMSD < 1 Å) when comparing receptor-antagonist complexes. Higher RMSD values (RMSD < 2.5 Å) were observed when comparing receptor-antagonist complexes and receptors with bound agonists, e.g. comparing PDB ID:3UON (M2R with a bound antagonist) to PDB ID: 4MQS (M2R with a bound agonist) yields RMSD = 2.46 Å. Please note that superposition of two receptor structures corresponding to inactive and active conformation is ambiguous due to significant changes in the position of TM helices. Therefore the measure of loop displacement is not exact. Visual inspection of different receptor structures indicated very small differences in ECL2 structure among the same receptor subtypes.

**Table S6. Comparison of the predicted models to available x-ray structures.** X-ray structures used in the calculations are listed in Table S5. ECL2 are compared using RMSD measure for ECL2 backbone atoms. RMSDs values were calculated after optimal superimposition of compared models with excluded loop fragments. For each receptor the following values are provided: average RMSD for available x-ray structures (together with standard deviation), minimum and maximum difference between RMSD calculated for receptor structure used in the modeling (values reported in the manuscript) and RMSD calculated for other available x-ray structure.

| Receptor name | Predicted model | Average RMSD (standard deviation) | RMSD difference (minimum, maximum) |
|---------------|-----------------|-----------------------------------|------------------------------------|
| RHO           | BEST            | 4.42 ( $\pm 0.34$ )               | -0.26, 0.85                        |
|               | LC100           | 4.56 ( $\pm 0.29$ )               | -0.08, 0.77                        |
|               | LC10            | 5.25 ( $\pm 0.23$ )               | -0.15, 0.63                        |
|               | LC              | 5.25 ( $\pm 0.23$ )               | -0.15, 0.63                        |
|               | LE100           | 4.54 ( $\pm 0.31$ )               | -0.13, 0.76                        |
|               | LE10            | 4.85 ( $\pm 0.26$ )               | -0.14, 0.69                        |
|               | LE              | 8.10 ( $\pm 0.12$ )               | -0.29, 0.08                        |
| $\beta$ 1AR   | BEST            | 3.22 ( $\pm 0.16$ )               | -0.34, 0.16                        |
|               | LC100           | 3.22 ( $\pm 0.16$ )               | -0.34, 0.16                        |
|               | LC10            | 5.33 ( $\pm 0.09$ )               | -0.17, 0.15                        |
|               | LC              | 6.85 ( $\pm 0.08$ )               | -0.10, 0.16                        |
|               | LE100           | 3.45 ( $\pm 0.08$ )               | -0.14, 0.25                        |
|               | LE10            | 3.49 ( $\pm 0.20$ )               | -0.40, 0.26                        |
|               | LE              | 5.75 ( $\pm 0.13$ )               | -0.32, 0.10                        |
| A2AR          | BEST            | 4.62 ( $\pm 0.17$ )               | -0.41, 0.18                        |
|               | LC100           | 5.78 ( $\pm 0.08$ )               | -0.27, 0.05                        |
|               | LC10            | 5.14 ( $\pm 0.24$ )               | -0.10, 0.67                        |
|               | LC              | 8.75 ( $\pm 0.08$ )               | -0.07, 0.21                        |
|               | LE100           | 5.96 ( $\pm 0.13$ )               | -0.05, 0.48                        |
|               | LE10            | 5.96 ( $\pm 0.13$ )               | -0.05, 0.48                        |
|               | LE              | 5.96 ( $\pm 0.13$ )               | -0.05, 0.48                        |
| $\beta$ 2AR   | BEST            | 3.35 ( $\pm 0.12$ )               | -0.17, 0.29                        |
|               | LC100           | 3.35 ( $\pm 0.12$ )               | -0.17, 0.29                        |
|               | LC10            | 4.43 ( $\pm 0.05$ )               | -0.07, 0.13                        |
|               | LC              | 6.75 ( $\pm 0.22$ )               | -0.31, 0.52                        |
|               | LE100           | 3.84 ( $\pm 0.13$ )               | -0.12, 0.37                        |
|               | LE10            | 4.41 ( $\pm 0.08$ )               | -0.11, 0.20                        |
|               | LE              | 5.59 ( $\pm 0.10$ )               | -0.02, 0.27                        |
| CXCR4         | BEST            | 2.51 ( $\pm 0.08$ )               | 0, 0.25                            |
|               | LC100           | 3.72 ( $\pm 0.14$ )               | 0, 0.37                            |
|               | LC10            | 3.72 ( $\pm 0.14$ )               | 0, 0.37                            |
|               | LC              | 3.72 ( $\pm 0.14$ )               | 0, 0.37                            |
|               | LE100           | 2.51 ( $\pm 0.08$ )               | 0, 0.25                            |
|               | LE10            | 2.94 ( $\pm 0.15$ )               | -0.42, 0                           |
|               | LE              | 2.94 ( $\pm 0.15$ )               | -0.42, 0                           |
| NTR1          | BEST            | 3.06 ( $\pm 0.04$ )               | 0, 0.11                            |
|               | LC100           | 3.55 ( $\pm 0.08$ )               | -0.25, 0                           |
|               | LC10            | 4.75 ( $\pm 0.06$ )               | -0.15, 0                           |
|               | LC              | 7.34 ( $\pm 0.25$ )               | -0.65, 0                           |
|               | LE100           | 3.55 ( $\pm 0.08$ )               | -0.25, 0                           |
|               | LE10            | 5.14 ( $\pm 0.23$ )               | 0, 0.63                            |
|               | LE              | 8.24 ( $\pm 0.29$ )               | -0.75, 0                           |
| M2R           | BEST            | 3.61 ( $\pm 0.68$ )               | 0, 1.47                            |
|               | LC100           | 3.61 ( $\pm 0.68$ )               | 0, 1.47                            |
|               | LC10            | 4.08 ( $\pm 0.28$ )               | 0, 0.64                            |
|               | LC              | 4.55 ( $\pm 0.30$ )               | 0, 0.66                            |
|               | LE100           | 3.42 ( $\pm 0.39$ )               | 0, 0.86                            |
|               | LE10            | 3.42 ( $\pm 0.39$ )               | 0, 0.86                            |
|               | LE              | 5.10 ( $\pm 0.04$ )               | -0.08, 0.02                        |
| DOR           | BEST            | 1.95 ( $\pm 0.03$ )               | 0, 0.06                            |
|               | LC100           | 2.16 ( $\pm 0.07$ )               | 0, 0.15                            |
|               | LC10            | 3.24 ( $\pm 0.00$ )               | -0.01, 0                           |
|               | LC              | 4.75 ( $\pm 0.12$ )               | -0.25, 0                           |
|               | LE100           | 2.89 ( $\pm 0.04$ )               | -0.08, 0                           |
|               | LE10            | 3.48 ( $\pm 0.14$ )               | -0.29, 0                           |
|               | LE              | 4.94 ( $\pm 0.10$ )               | -0.20, 0                           |

|      |       |                     |         |
|------|-------|---------------------|---------|
| S1PR | BEST  | 4.47 ( $\pm 0.08$ ) | 0, 0.15 |
|      | LC100 | 5.91 ( $\pm 0.06$ ) | 0, 0.12 |
|      | LC10  | 7.75 ( $\pm 0.10$ ) | 0, 0.19 |
|      | LC    | 8.55 ( $\pm 0.07$ ) | 0, 0.13 |
|      | LE100 | 6.87 ( $\pm 0.01$ ) | 0, 0.01 |
|      | LE10  | 7.46 ( $\pm 0.06$ ) | 0, 0.12 |
|      | LE    | 7.46 ( $\pm 0.06$ ) | 0, 0.12 |

**Table S7. Residues located within ECLs fragments and interacting with bound ligands as seen in x-ray structures used in this study.**

| <b>Receptor name</b> | <b>PDB ID</b> | <b>Ligand</b> | <b>ECL: (residues)</b>                                    |
|----------------------|---------------|---------------|-----------------------------------------------------------|
| A2AR                 | 4E1Y          | UK-432097     | ECL2: (Phe168, Glu169)                                    |
| $\beta$ 1AR          | 2Y00          | Dobutamine    | ECL2: (Phe201)                                            |
| $\beta$ 2AR          | 2RH1          | Carazolol     | ECL2: (Phe193)                                            |
| M2R                  | 3UON          | QNB           | ECL2: (Phe181)                                            |
| M3R                  | 4DAJ          | Tiotropium    | -                                                         |
| CXCR4                | 3ODU          | IT1t          | -                                                         |
| D3R                  | 3PBL          | Eticlopride   | -                                                         |
| NTR1                 | 4GRV          | NTS           | ECL2: (Arg213, Val224, Thr226),<br>ECL3: (Glu337, Trp339) |
| DOR                  | 4EJ4          | Naltrindole   | -                                                         |
| NOP                  | 4EA3          | C-24          | -                                                         |
| MOR                  | 4DKL          | $\beta$ -FNA  | -                                                         |
| RHO                  | 1U19          | Retinal       | -                                                         |
| S1PR                 | 3V2W          | ML056         | -                                                         |
